# Supplementary material for: Creating Amylose-Free Barley Cultivars with High Soluble Sugar Content By Genome Editing
Source: Research Square preprint supplement (doi:10.21203/rs.3.rs-1143686/v1), 2021-12-23
Supplement: Supplementary file 1 [file 49264bd3f28d58f9b5821c5f.docx]

**Supplementary material**

**Figure(s)**

**Figure S1.** The determination of transgenic plants. (A) Leaves assay of transgenic plants for bar protein by PAT/bar test strip resistance kit. (B) PCR detection of Ubi region in transgenic plants. WT: wild type; wx1 to wx19: independent transgenic plants.

**Figure S2.** (A)The domains of GBSS I protein and (B) amino acids sequence alignment of *Waxy* allelic genes.

**Figure S3.** The starch granules images of different developing grains. (A-D) wild type, (E-H) wx14. Black arrow: A-type granules; white arrow: B-type granules. dpa: day post anthesis.

**Figure S4.** The relative expression levels of *Waxy* gene in different developing grains. dpa: day post anthesis; bars: standard errors; values followed by the same letters in each sample are not significantly different at p < 0.01 level.


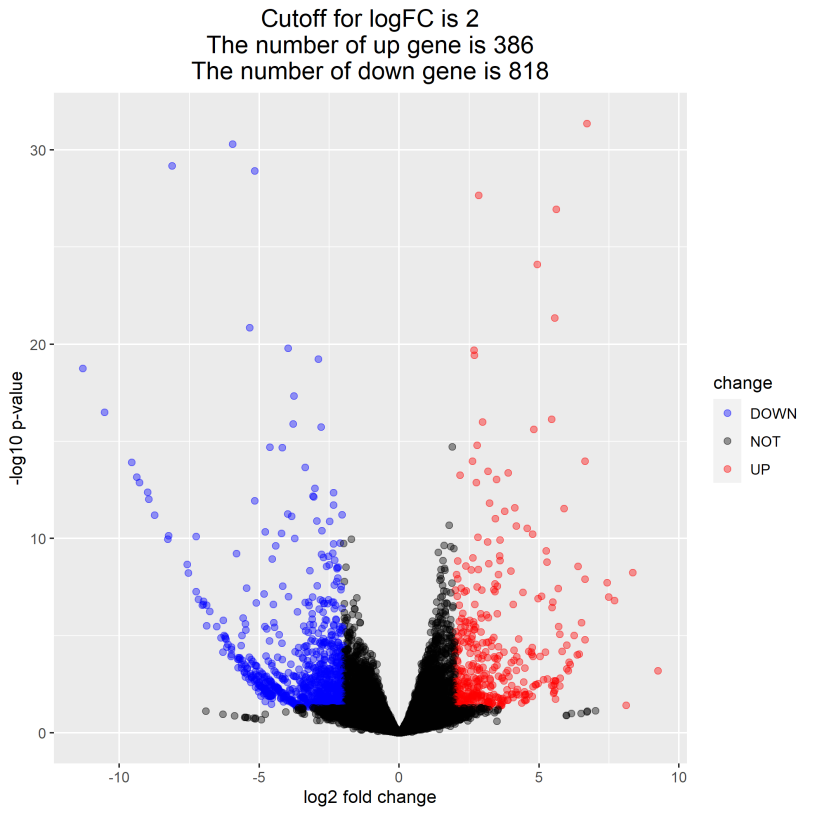


**Figure S5.** DEGs in the grains between wild type and wx14. Red point: down-regulated genes; blue point: up-regulated genes in wx14; grey point: not differentially expressed genes between wild type and wx14.

**Figure S6.** The KEGG pathway analysis of DEGs between wild type and wx14.

**Table S1**

Primer sequences used in this research.

| **Primers** | **Primer sequences** |
| --- | --- |
| wxF | CTCTCACTGCAGGTAGCCAC |
| wxR | CAGGCGTCCTTGTACTGATC |
| T1F | AATAATGGTCTCAGGCGGCATGAACCTCGTGTTCGT |
| T1F0 | GGCATGAACCTCGTGTTCGTGTTTTAGAGCTAGAAATAGC |
| T2R0 | GGACGCCGGAATCTGTCGGTGCTTCTTGGTGCCGC |
| T2R | ATTATTGGTCTCTAAACGGACGCCGGAATCTGTCGGT |
| ubiF | CGGTAGTTCTACTTCTGTTC |
| ubiR | CATCTCTGTATATGCATCAG |
| wxQF | CCAGTCCAATGGCATCTACA |
| wxQR | GGCTCACCGTCAGCACCT |
| α-TublinF | CAAGGAGGTGGACGAGCAGATG |
| α-TublinR | GACTTGACGTTGTTGGGGATCCA |

**Table S2**

Grain compounds between wild type and wx14.

|  | **Amylose (%)** | **Amylopection (%)** | **Soluble sugar (%)** | **Sucrose (%)** | **β-Glucan (%)** | **Protein (%)** |
| --- | --- | --- | --- | --- | --- | --- |
| Wild type | 33.50±2.64 | 39.00±3.12 | 10.2±0.35 | 0.73±0.08 | 3.22±0.12 | 10.88±0.08 |
| Wx14 | 0.00±0.00** | 31.73±0.50* | 37.3±2.54** | 1.20±0.07** | 4.36±0.15** | 11.94±0.15** |

* P < 0.05; ** P < 0.01.

**Table S3**

Agronomic traits between wild type and wx14.

|  | **Plant height (cm)** | **Number of tillers** | **Panicle length (cm)** | **Grains per spike** | **Thousand grain weight(g)** |
| --- | --- | --- | --- | --- | --- |
| Wild type | 79.35±3.28 | 9.05±2.41 | 9.33±1.20 | 30.60±2.56 | 44.40±1.42 |
| Wx14 | 78.75±3.29 | 8.20±1.69 | 9.35±0.97 | 28.80±2.67 | 39.77±0.54** |

** P < 0.01.

**Table S4**

DEGs related to starch and sucrose metabolism between wild type and wx14.

| **Unigenes** | **log2FoldChange** | **Change** | **KEGG Annotation** | **KEGG ID** |
| --- | --- | --- | --- | --- |
| HORVU.MOREX.r2.5HG0406880.1.mrna1 | 6.12 | up | beta-glucosidase | [EC:3.2.1.21] |
| HORVU.MOREX.r2.6HG0522120.1.mrna1 | 4.91 | up | beta-glucosidase | [EC:3.2.1.21] |
| HORVU.MOREX.r2.7HG0535140.1.mrna1 | 4.08 | up | glucan endo-1,3-beta-glucosidase 1/2/3 | [EC:3.2.1.39] |
| HORVU.MOREX.r2.7HG0598800.1.mrna1 | 3.60 | up | beta-glucosidase | [EC:3.2.1.21] |
| HORVU.MOREX.r2.6HG0508120.1.mrna1 | 3.26 | up | endoglucanase | [EC:3.2.1.4] |
| HORVU.MOREX.r2.5HG0414040.1.mrna1 | 3.25 | up | glucan endo-1,3-beta-glucosidase 1/2/3 | [EC:3.2.1.39] |
| HORVU.MOREX.r2.6HG0499810.1.mrna1 | 3.11 | up | beta-glucosidase | [EC:3.2.1.21] |
| HORVU.MOREX.r2.7HG0553070.1.mrna1 | 3.08 | up | starch synthase | [EC:2.4.1.21] |
| HORVU.MOREX.r2.2HG0158540.1.mrna1 | 2.96 | up | glucan endo-1,3-beta-glucosidase 1/2/3 | [EC:3.2.1.39] |
| HORVU.MOREX.r2.5HG0425120.1.mrna1 | 2.94 | up | glycogen phosphorylase | [EC:2.4.1.1] |
| HORVU.MOREX.r2.7HG0585010.1.mrna1 | 2.85 | up | beta-glucosidase | [EC:3.2.1.21] |
| HORVU.MOREX.r2.3HG0266640.1.mrna1 | 2.78 | up | glucan endo-1,3-beta-glucosidase 1/2/3 | [EC:3.2.1.39] |
| HORVU.MOREX.r2.7HG0540020.1.mrna1 | 2.73 | up | beta-glucosidase | [EC:3.2.1.21] |
| HORVU.MOREX.r2.2HG0137200.1.mrna1 | 2.67 | up | beta-fructofuranosidase | [EC:3.2.1.26] |
| HORVU.MOREX.r2.7HG0543180.1.mrna1 | 2.52 | up | starch synthase | [EC:2.4.1.21] |
| HORVU.MOREX.r2.7HG0623530.1.mrna1 | 2.40 | up | 1,4-alpha-glucan branching enzyme | [EC:2.4.1.18] |
| HORVU.MOREX.r2.7HG0577820.1.mrna1 | 2.35 | up | glucose-1-phosphate adenylyltransferase | [EC:2.7.7.27] |
| HORVU.MOREX.r2.6HG0510740.1.mrna1 | 2.25 | up | beta-glucosidase | [EC:3.2.1.21] |
| HORVU.MOREX.r2.6HG0498580.1.mrna1 | 2.23 | up | trehalose 6-phosphate phosphatase | [EC:3.1.3.12] |
| HORVU.MOREX.r2.2HG0136670.1.mrna1 | 2.23 | up | 1,4-alpha-glucan branching enzyme | [EC:2.4.1.18] |
| HORVU.MOREX.r2.1HG0075760.1.mrna1 | 2.05 | up | glucose-1-phosphate adenylyltransferase | [EC:2.7.7.27] |
| HORVU.MOREX.r2.1HG0045280.1.mrna1 | -2.00 | down | beta-amylase | [EC:3.2.1.2] |
| HORVU.MOREX.r2.7HG0535060.1.mrna1 | -2.04 | down | granule-bound starch synthase | [EC:2.4.1.242] |
| HORVU.MOREX.r2.4HG0344930.1.mrna1 | -2.11 | down | beta-fructofuranosidase | [EC:3.2.1.26] |
| HORVU.MOREX.r2.7HG0591610.1.mrna1 | -2.16 | down | beta-glucosidase | [EC:3.2.1.21] |
| HORVU.MOREX.r2.7HG0596110.1.mrna1 | -2.31 | down | alpha-glucosidase | [EC:3.2.1.20] |
| HORVU.MOREX.r2.3HG0261390.1.mrna1 | -2.35 | down | beta-glucosidase | [EC:3.2.1.21] |
| HORVU.MOREX.r2.7HG0596190.1.mrna1 | -2.49 | down | alpha-glucosidase | [EC:3.2.1.20] |
| HORVU.MOREX.r2.5HG0406300.1.mrna1 | -2.80 | down | alpha-glucosidase | [EC:3.2.1.20] |
| HORVU.MOREX.r2.2HG0094620.1.mrna1 | -2.80 | down | beta-fructofuranosidase | [EC:3.2.1.26] |
| HORVU.MOREX.r2.1HG0012530.1.mrna1 | -2.92 | down | endoglucanase | [EC:3.2.1.4] |
| HORVU.MOREX.r2.3HG0192330.1.mrna1 | -3.08 | down | beta-glucosidase | [EC:3.2.1.21] |
| HORVU.MOREX.r2.3HG0239670.1.mrna1 | -3.67 | down | beta-glucosidase | [EC:3.2.1.21] |
| HORVU.MOREX.r2.5HG0402940.1.mrna1 | -5.22 | down | alpha-amylase | [EC:3.2.1.1] |
| HORVU.MOREX.r2.7HG0596180.1.mrna1 | -5.27 | down | alpha-glucosidase | [EC:3.2.1.20] |
| HORVU.MOREX.r2.3HG0266210.1.mrna1 | -5.51 | down | glucan endo-1,3-beta-glucosidase 1/2/3 | [EC:3.2.1.39] |
